# Supplementary material for: Mannich bases of hydroxycoumarins: synthesis, DFT/QTAIM computational study and assessment of biological activity
Source: Royal Society of Chemistry journal article supplement (doi:10.1039/d1ra04611j), 2021-01-01
Supplement: d1ra04611j1.pdf [file d1ra04611j1.pdf]

## Mannich bases of hydroxycoumarins: synthesis, DFT/QTAIM computational study and assessment of biological activity.

J. Sergio Durand-Niconoff,<sup>a</sup> Erik Ortiz-Blanco,<sup>a</sup> Gabriela Sosa-Ortiz,<sup>b</sup> José L. Olivares-Romero,<sup>c</sup> Enrique Juárez-Aguilar,<sup>d</sup> Eva Luz Montoya-Hernández,<sup>d</sup> Cynthia Fernández-Pomares,<sup>e</sup> Ricardo Tovar-Miranda,<sup>a</sup> María Eugenia Castro,<sup>f</sup> Francisco J. Melendez,<sup>\*g</sup> and Tomás Guerrero<sup>\*a</sup>

<sup>a</sup>Instituto de Ciencias Básicas, Universidad Veracruzana, Dr. Luis Castelazo Ayala s/n, Col. Industrial Ánimas, Xalapa, Ver., 91190, México. e-mail: [tguerrero@uv.mx](mailto:tguerrero@uv.mx)

<sup>b</sup>Universidad Veracruzana, Facultad de Bioanálisis, Médicos s/n, U. H. del Bosque, Xalapa, Ver., 91010, México.

<sup>c</sup>Red de Estudios Moleculares Avanzados, Clúster Científico y Tecnológico BioMimic®, Instituto de Ecología A. C. (INECOL), Carretera antigua a Coatepec No. 351, Col. El Haya, Xalapa, Ver., 91070, México.

<sup>d</sup>Universidad Veracruzana, Instituto de Ciencias de la Salud, Dr. Luis Castelazo Ayala s/n, Col. Industrial Ánimas, Xalapa, Ver., 91190, México.

<sup>e</sup>Universidad Veracruzana, Programa de Especialización en Métodos Estadísticos. Facultad de Estadística e Informática, Av. Xalapa s/n, Col. Obrero Campesino, Xalapa, Ver., 91020, México.

<sup>f</sup>Centro de Química, Instituto de Ciencias, Benemérita Universidad Autónoma de Puebla, Complejo de Ciencias, ICUAP, Edif. IC8, 22 Sur y San Claudio, Ciudad Universitaria, 72570 Puebla, Puebla, México.

<sup>g</sup>Lab. de Química Teórica, Centro de Investigación, Depto. De Físicoquímica, Facultad de Ciencias Químicas, Benemérita Universidad Autónoma de Puebla, Edif. FCQ10, 22 Sur y San Claudio, Ciudad Universitaria, Col. San Manuel, 72570 Puebla, México.

e-mail: [francisco.melendez@correo.buap.mx](mailto:francisco.melendez@correo.buap.mx)

## Supplementary Information (SI)

### 1. Synthesis and characterization

$^1\text{H-NMR}$  spectroscopy of the derivatives of 7-hydroxycoumarin (Compounds **5a-5c**) shows the expected pattern of signals, two double signals in 7.50 and 6.70 ppm approximately, both with coupling constants near to 8.8 Hz and integrals to one hydrogen nuclei. These signals are the expected for the hydrogen atoms in positions 5 and 6 (see Scheme 1) of a tetrasubstituted aromatic ring. In 6.09 ppm the vinylic signal is found, and at low frequency the methylene and methyl substituents appear at 3.90 and 2.34 ppm, respectively. The signals of substituents of the secondary amines appear in the expected region of aliphatic groups, for instance in compound **5a** specifically as multiple signals in 2.53 ppm, which was assigned as de hydrogen atoms alpha to the nitrogen of the amine, and the rest of the chain in 1.54 and 1.43 ppm, respectively. The results of  $^1\text{H-NMR}$  spectroscopy of the derivatives of 6,7-dihydroxycoumarin (Compounds **5d-5f**) shows the expected single signal around 6.89 ppm which was assigned to the only aromatic hydrogen nucleus in the benzene ring of the coumarin, in 5.99 the vinylic signal is observed, in most of the cases the long range coupling with the methyl in position 4 is observed, the rest of the molecule, both the methylene and the methyl signals and the aliphatic chain of the substituents of the amine group are observable within the aliphatic region of the spectra.

#### 1.1 7-hydroxy-4-methylcoumarin (**4a**).

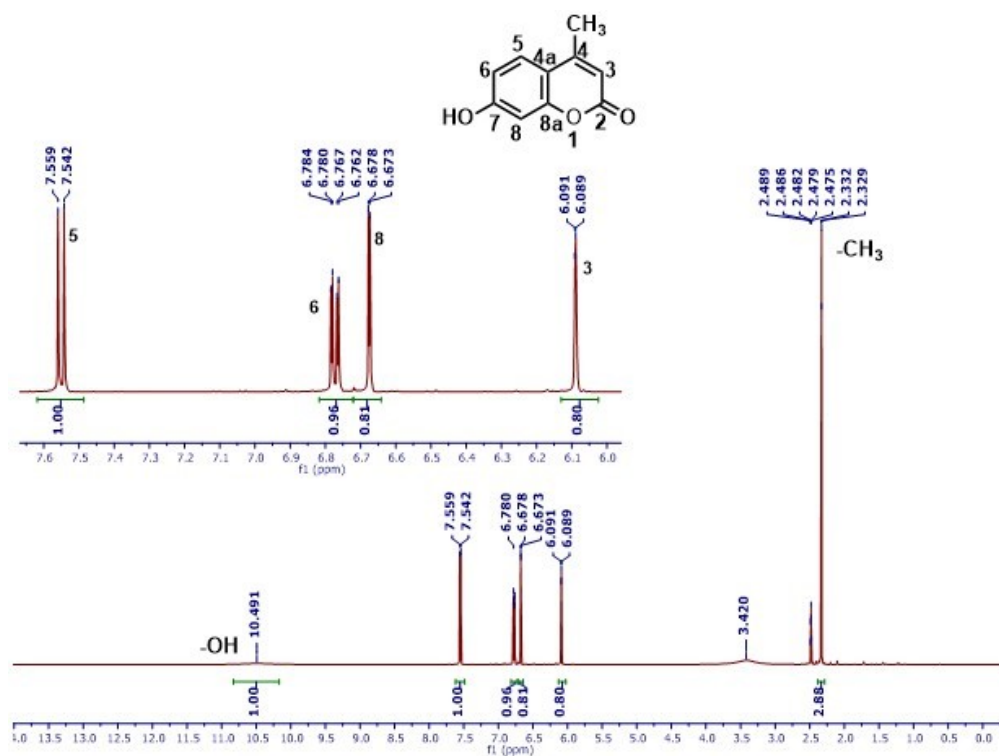

$^1\text{H-NMR}$  (500 MHz,  $\text{DMSO-}d_6$ )

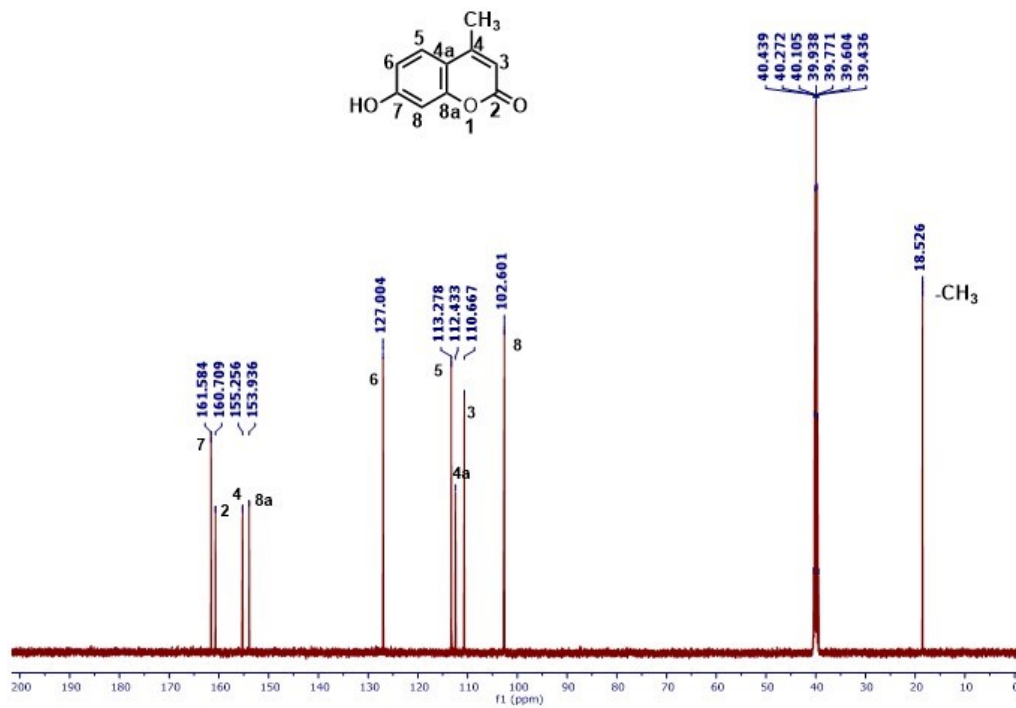

<sup>13</sup>C-NMR (125 MHz, DMSO-*d*<sub>6</sub>)

## 1.2 6,7-dihydroxy-4-methylcoumarin (4b).

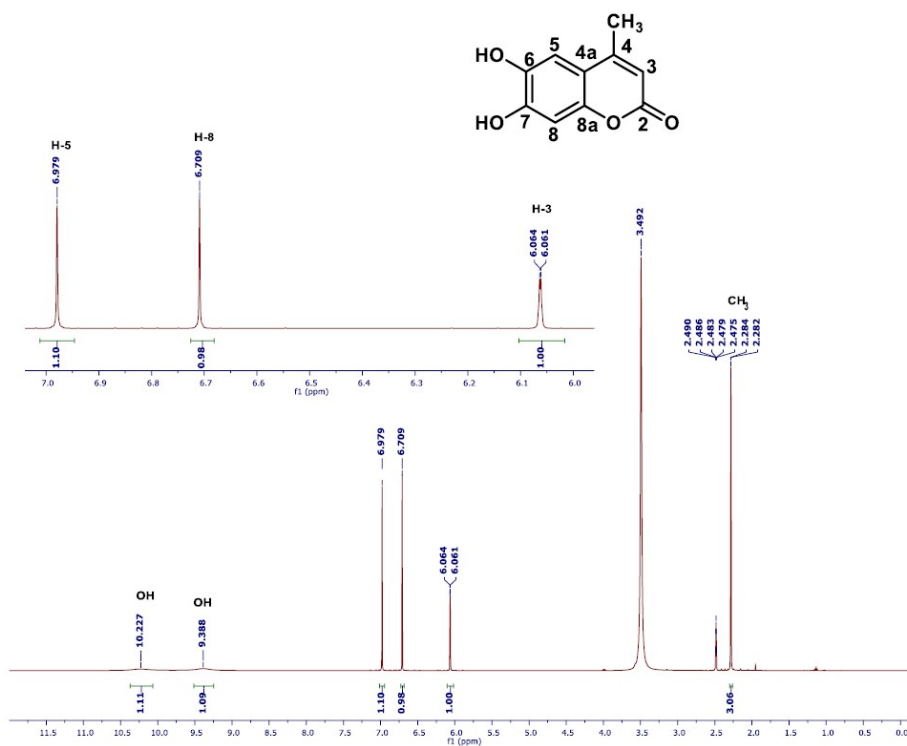

<sup>1</sup>H-NMR (500 MHz, DMSO-*d*<sub>6</sub>)

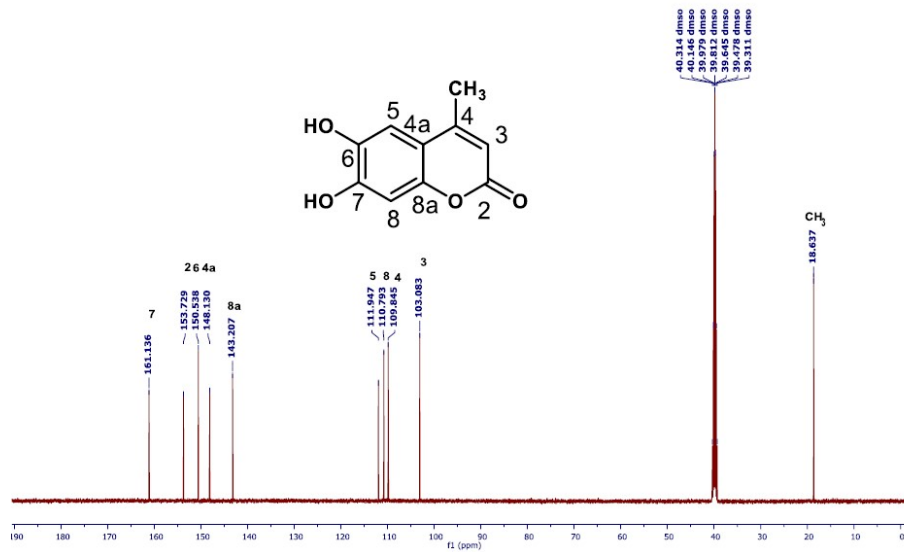

<sup>13</sup>C-NMR (125 MHz, DMSO-d<sub>6</sub>)

1.3 7-hydroxy-4-methyl-8-(piperidin-1-ylmethyl)-2H-chromen-2-one (5a).

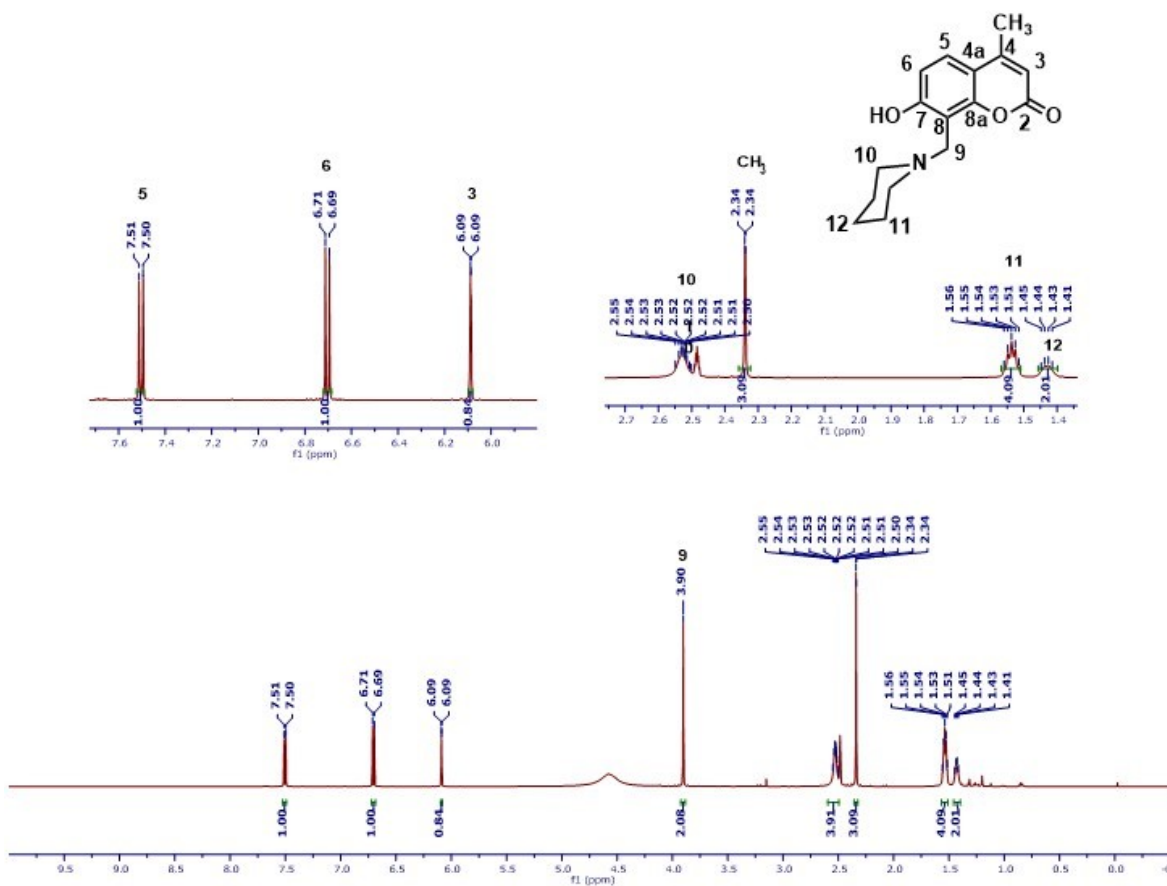

<sup>1</sup>H-NMR (500 MHz, DMSO-d<sub>6</sub>)

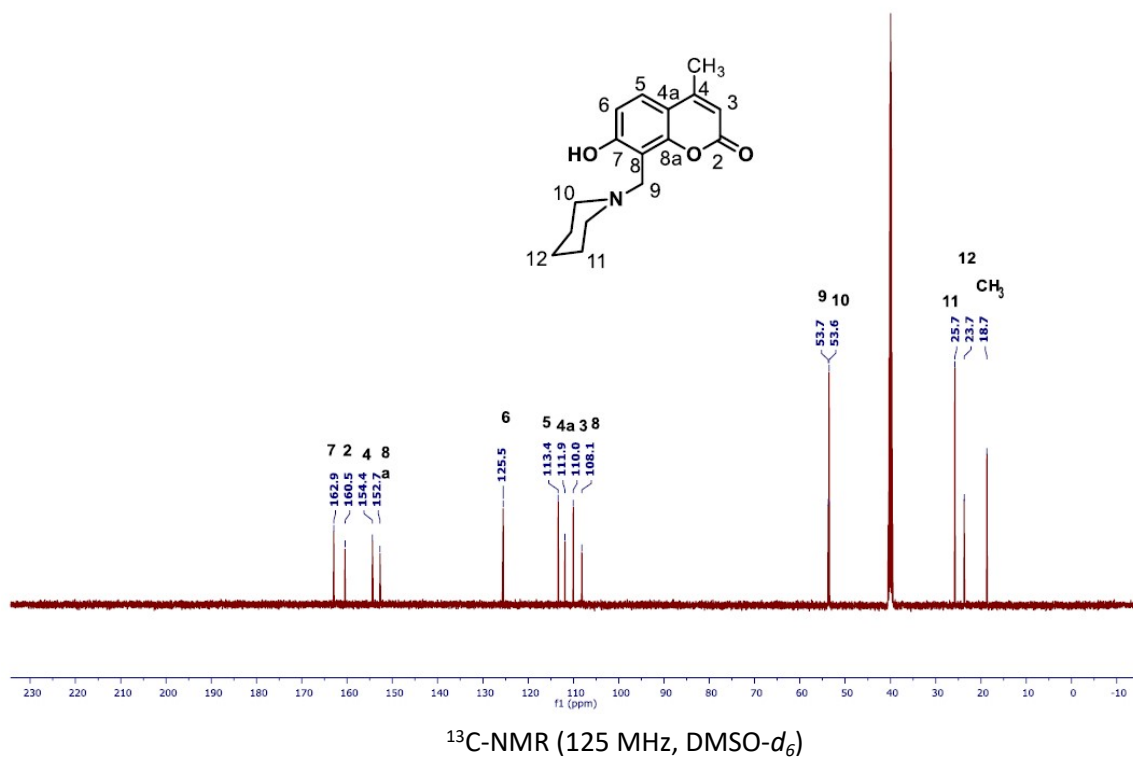

1.4 7-hydroxy-4-methyl-8-(pyrrolidin-1-ylmethyl)-2H-chromen-2-one (**5b**).

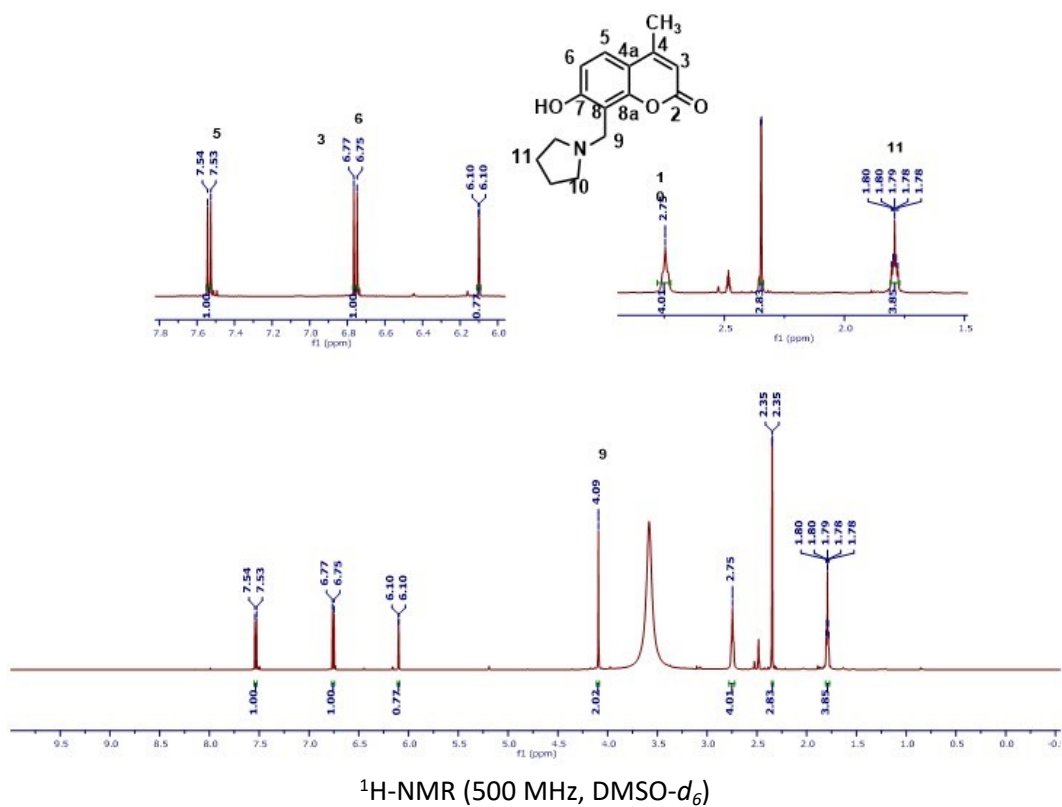

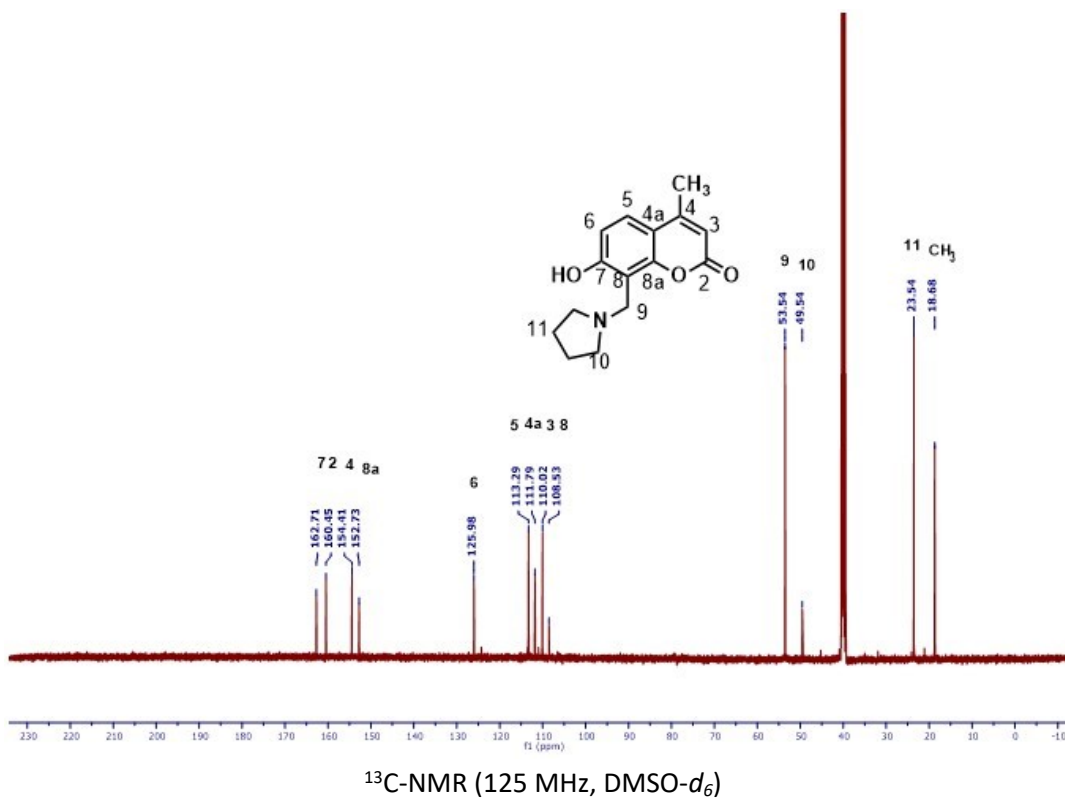

1.5 8-((diethylamino)methyl)-7-hydroxy-4-methyl-2H-chromen-2-one (**5c**).

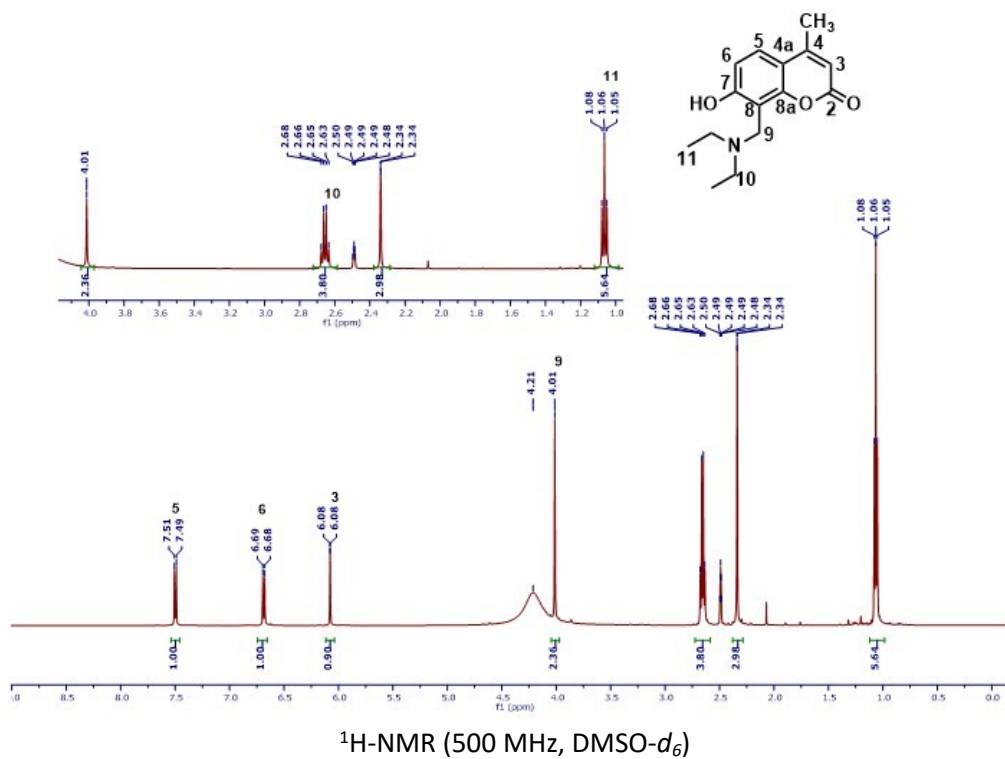

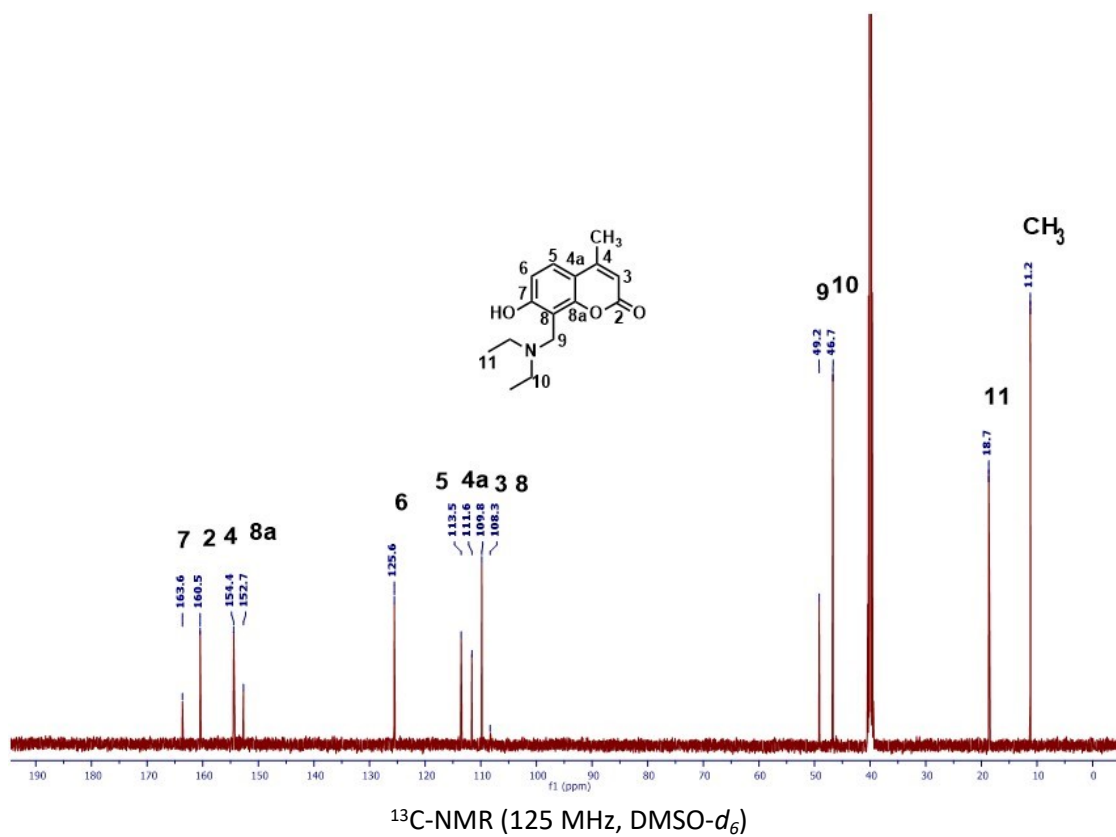

1.6 6,7-dihydroxy-4-methyl-8-(piperidin-1-ylmethyl)-2H-chromen-2-one (**5d**).

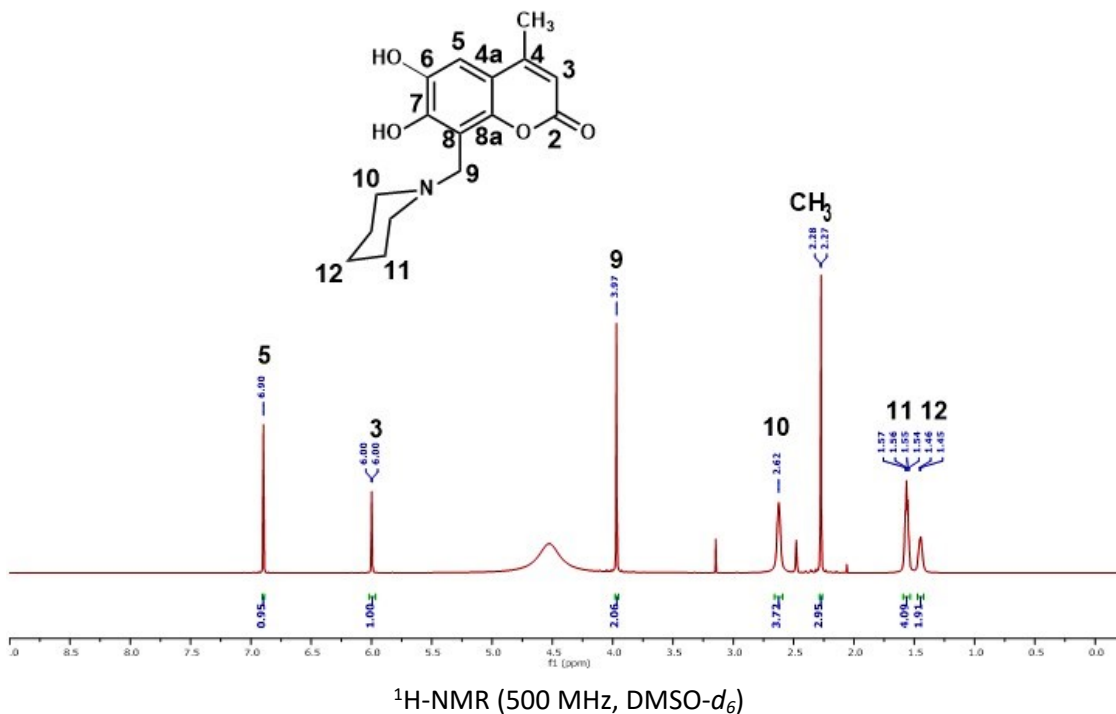

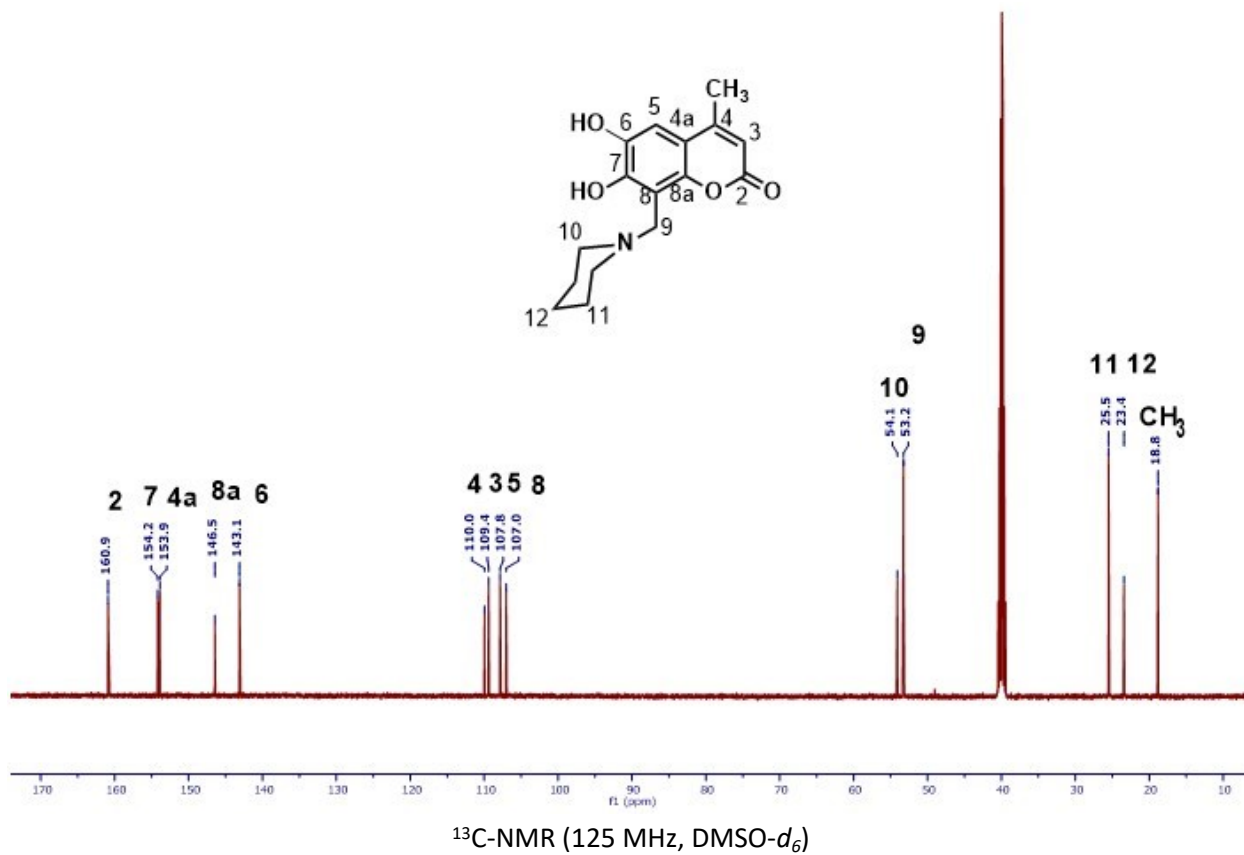

1.7 6,7-dihydroxy-4-methyl-8-(pyrrolidin-1-ylmethyl)-2H-chromen-2-one (**5e**).

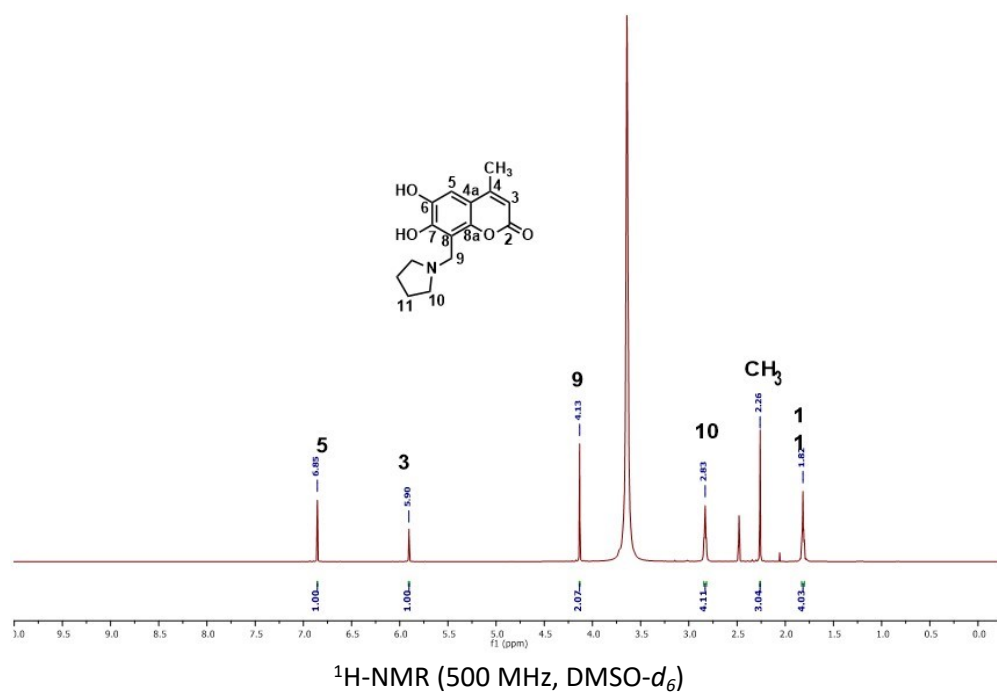



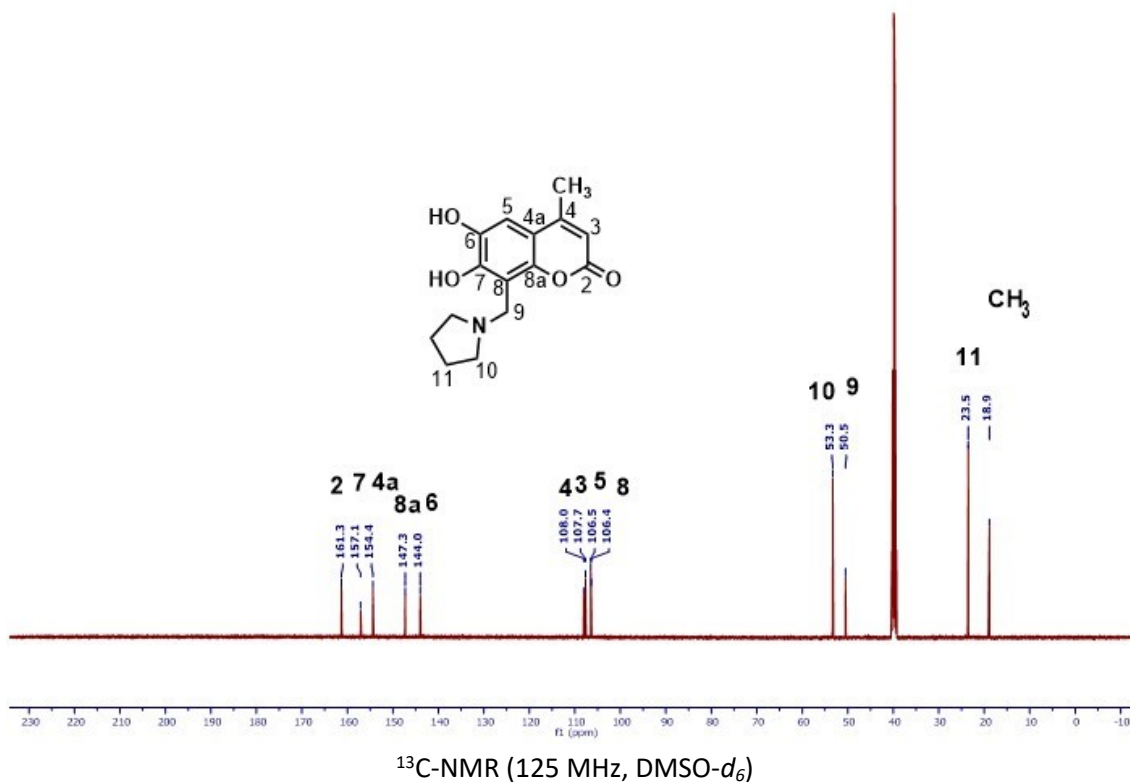

1.8-((diethylamino)methyl)-6,7-dihydroxy-4-methyl-2H-chromen-2-one (**5f**).

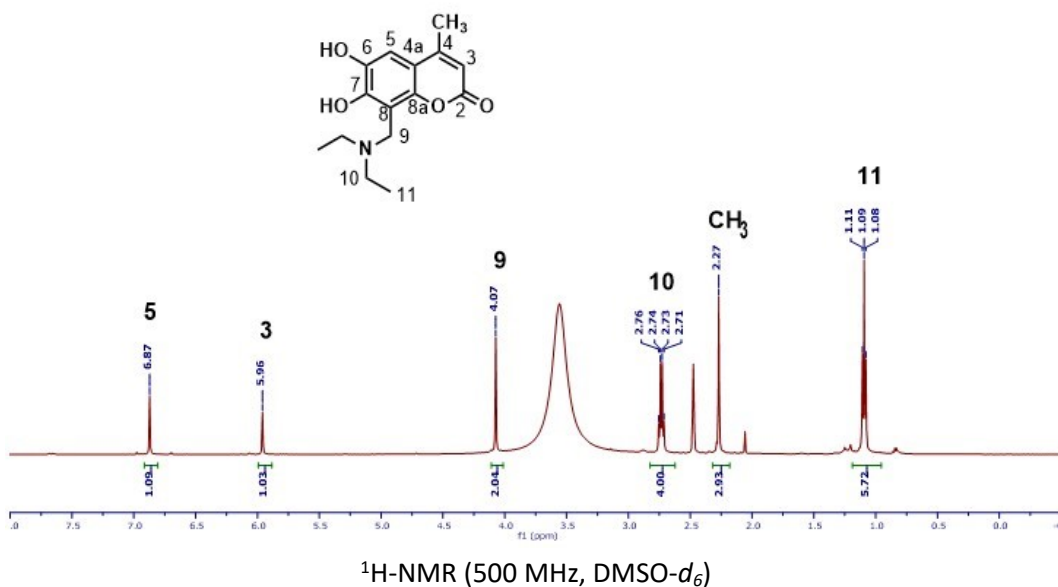

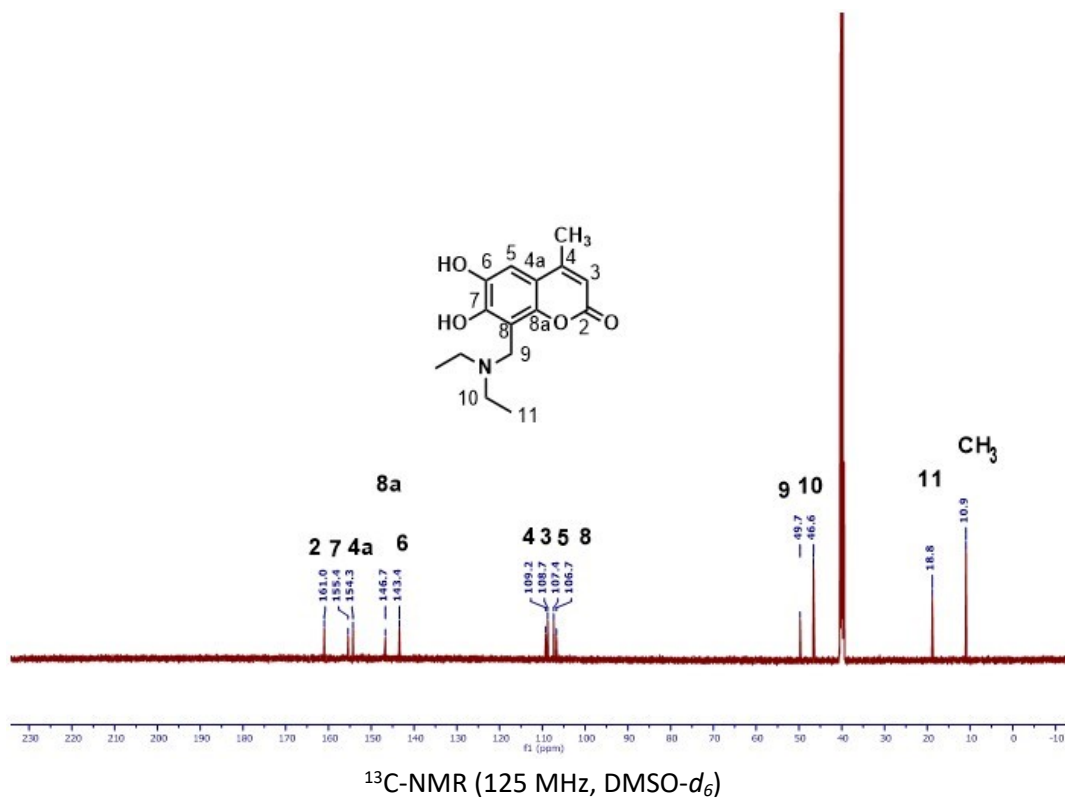

2. UV-Vis normalized absorption in HPLC Methanol

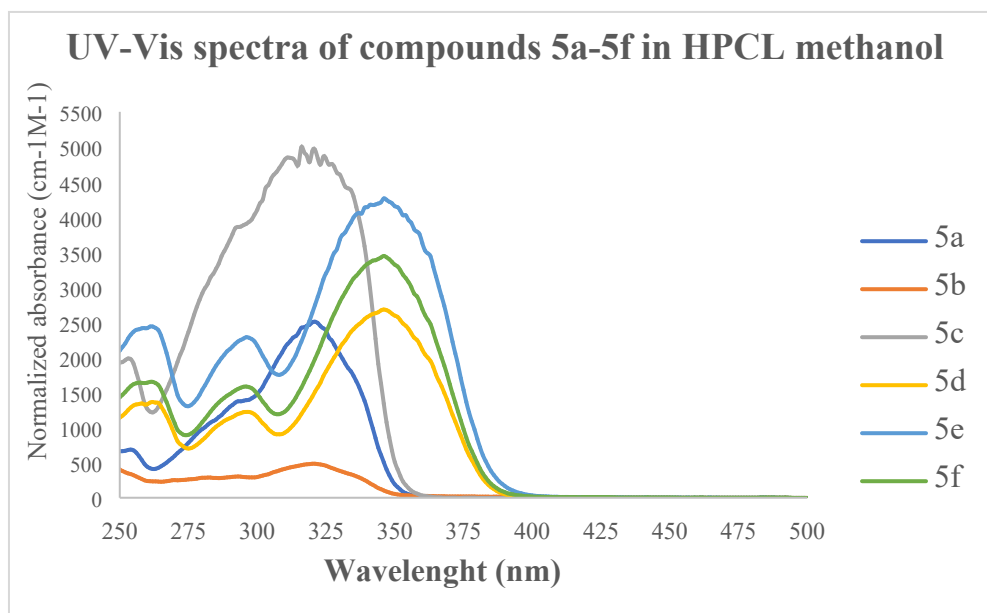

### 3. Computational details

#### 3.1 Cartesian coordinates optimized of 7-hydroxy-4-methylcoumarin (**4a**) at PBE0/aug-cc-pvTZ level theory using the SMD model solvation.

Charge = 0 Multiplicity = 1

|   |             |             |             |
|---|-------------|-------------|-------------|
| C | -2.34100691 | 1.03084609, | 0.00000117  |
| C | -2.52596093 | -0.35588202 | -0.00000176 |
| C | -1.43798335 | -1.21376906 | -0.00000185 |
| C | -0.16621321 | -0.66869536 | 0.00000282  |
| C | 0.05902087  | 0.71070432  | 0.00000625  |
| C | -1.06723719 | 1.54631007  | 0.00000413  |
| O | 0.86973748  | -1.55336406 | 0.00000777  |
| C | 2.17501383  | -1.13851704 | 0.00003134  |
| C | 2.42139208  | 0.26925156  | 0.00000313  |
| C | 1.41737450  | 1.18152874  | 0.00000216  |
| O | 3.02077520  | -2.01841267 | -0.00003363 |
| C | 1.70656545  | 2.64036808  | -0.00000933 |
| O | -3.80049169 | -0.81283583 | -0.00000560 |
| H | -3.20735306 | 1.67973423  | -0.00000014 |
| H | -1.57166077 | -2.28869372 | -0.00000402 |
| H | -0.92949062 | 2.61996091  | 0.00000408  |
| H | 3.45961911  | 0.57248460  | -0.00001393 |
| H | 2.77939349  | 2.82451124  | -0.00001309 |
| H | 1.26567030  | 3.11969007  | 0.87768262  |
| H | 1.26566698  | 3.11967503  | -0.87770773 |
| H | -3.80715943 | -1.77726190 | -0.00000794 |

E(PBE0) = -611.117848 Hartree

Dipole Moment = 7.242106 Debye

#### 3.2 Cartesian coordinates optimized of 6,7-dihydroxy-4-methyl-2H-chromen-2-one (**4b**) at PBE0/aug-cc-pvTZ level theory using the SMD model solvation.

Charge = 0 Multiplicity = 1

|   |             |             |             |
|---|-------------|-------------|-------------|
| O | -0.40616153 | -1.49026392 | -0.52006853 |
| C | -1.13566310 | -2.64057303 | -0.40719225 |
| C | -2.51579959 | -2.51397427 | -0.05842472 |
| C | -3.10461014 | -1.31039627 | 0.15782331  |
| C | -2.80143734 | 1.17752089  | 0.22922296  |
| C | 1.98184173  | 2.27040801  | 0.09090200  |
| C | -0.62849668 | 2.09623863  | -0.25396010 |
| C | -0.12064095 | 0.82904290  | -0.45414164 |
| C | -0.96148126 | -0.26173051 | -0.31044980 |
| C | -2.30694463 | -0.12090789 | 0.03048869  |
| O | -2.38134217 | 3.56102538  | 0.26584110  |
| O | 0.18856984  | 3.16448559  | -0.39322052 |
| O | -0.53668709 | -3.68474125 | -0.61638163 |
| C | -4.54386479 | -1.21413823 | 0.51940788  |
| H | -3.07483762 | -3.43612953 | 0.02566698  |
| H | -3.84071839 | 1.32987811  | 0.49522904  |

|   |             |             |             |
|---|-------------|-------------|-------------|
| H | -3.31626982 | 3.58941551  | 0.49725555  |
| H | -0.31285153 | 3.97214539  | -0.22198217 |
| H | -4.99864507 | -2.20156150 | 0.57317235  |
| H | -5.08554637 | -0.61440939 | -0.21661084 |
| H | -4.66479261 | -0.71563325 | 1.48466397  |
| H | 0.91955230  | 0.69190670  | -0.71952530 |

E(PBE0) = -686.301412 Hartree

Dipole Moment = 11.940913 Debye

### 3.3 Cartesian coordinates optimized of 7-hydroxy-4-methyl-8-(piperidin-1-ylmethyl)-2*H*-chromen-2-one (**5a**) at PBE0/aug-cc-pvTZ level using the SMD model solvation.

Charge = 0 Multiplicity = 1

|   |             |             |            |
|---|-------------|-------------|------------|
| C | -0.91869082 | 1.84654291  | -1.3260873 |
| C | -1.41288353 | 0.53773493  | -1.2658547 |
| C | -0.73810358 | -0.45560557 | -0.5442296 |
| C | 0.43290777  | -0.08204014 | 0.1039812  |
| C | 0.95163883  | 1.21784955  | 0.0634680  |
| C | 0.24337877  | 2.17572841  | -0.6741932 |
| O | 1.08331603  | -1.06562018 | 0.7892996  |
| C | 2.24428382  | -0.83905451 | 1.4743320  |
| C | 2.77790237  | 0.48438798  | 1.4476411  |
| C | 2.17139818  | 1.49234566  | 0.7704131  |
| O | 2.72603540  | -1.80169211 | 2.0517762  |
| C | 2.75471230  | 2.86132706  | 0.7568669  |
| O | -2.55309967 | 0.24905791  | -1.9159738 |
| C | -1.22781364 | -1.87948440 | -0.5381000 |
| N | -2.68671206 | -1.96266052 | -0.6292880 |
| C | -3.11197565 | -3.28718770 | -1.0821995 |
| C | -4.61801998 | -3.35395902 | -1.2458598 |
| C | -5.32763127 | -2.97427821 | 0.0445026  |
| C | -4.82683726 | -1.62639023 | 0.5388236  |
| C | -3.31483046 | -1.62006197 | 0.6498849  |
| H | -1.47092354 | 2.58537338  | -1.8932338 |
| H | 0.61839744  | 3.18954927  | -0.7277088 |
| H | 3.69711531  | 0.64334703  | 1.9950224  |
| H | 3.67293169  | 2.89799929  | 1.3405195  |
| H | 2.04666810  | 3.58566862  | 1.1670676  |
| H | 2.97424210  | 3.17646879  | -0.2662487 |
| H | -2.82580523 | -0.68118319 | -1.5766537 |
| H | -0.86243620 | -2.41021459 | 0.3480565  |
| H | -0.81334419 | -2.39562823 | -1.4101764 |
| H | -2.77991137 | -4.04924950 | -0.3591257 |
| H | -2.61369020 | -3.49728123 | -2.0307786 |
| H | -4.89386933 | -4.36305646 | -1.5610300 |
| H | -4.91942988 | -2.67130056 | -2.0472929 |
| H | -5.12486595 | -3.73583431 | 0.8060431  |
| H | -6.40976014 | -2.95201485 | -0.1047402 |
| H | -5.25342455 | -1.38414003 | 1.5150233  |
| H | -5.13849721 | -0.83808948 | -0.1545000 |

|   |             |             |           |
|---|-------------|-------------|-----------|
| H | -2.99041607 | -2.33939347 | 1.4183310 |
| H | -2.95698628 | -0.63434027 | 0.9556422 |

E(PBE0) = -900.896891 Hartree  
Dipole Moment = 5.163712 Debye

3.4 Cartesian coordinates optimized of 7-hydroxy-4-methyl-8-(pyrrolidin-1-ylmethyl)-2H-chromen-2-one (**5b**) at PBE0/aug-cc-pvTZ level using the SMD model solvation.

Charge = 0 Multiplicity = 1

|   |             |             |             |
|---|-------------|-------------|-------------|
| C | -0.80423409 | 1.91601282  | -1.37849935 |
| C | -1.31289818 | 0.61197303  | -1.34769380 |
| C | -0.68033692 | -0.39252819 | -0.60482368 |
| C | 0.46830329  | -0.03598861 | 0.09164602  |
| C | 1.00134592  | 1.25852126  | 0.08119653  |
| C | 0.33316827  | 2.22897837  | -0.67703341 |
| O | 1.08066506  | -1.03116200 | 0.79482813  |
| C | 2.21598172  | -0.82169350 | 1.52676727  |
| C | 2.76362072  | 0.49636164  | 1.53118712  |
| C | 2.19479624  | 1.51532436  | 0.83812455  |
| O | 2.66488633  | -1.79344535 | 2.11515553  |
| C | 2.79210821  | 2.87814025  | 0.85759858  |
| O | -2.42623350 | 0.33979279  | -2.05104656 |
| C | -1.18792371 | -1.80965701 | -0.62058682 |
| N | -2.63846839 | -1.87587906 | -0.76855340 |
| C | -3.11451607 | -3.21826709 | -1.10584411 |
| C | -4.61722633 | -3.15524251 | -0.85276921 |
| C | -4.79096472 | -2.01410496 | 0.17179082  |
| C | -3.37169742 | -1.53685826 | 0.45463295  |
| H | -1.32511445 | 2.66388215  | -1.96315254 |
| H | 0.72001734  | 3.23930306  | -0.70735611 |
| H | 3.66204608  | 0.64184064  | 2.11557598  |
| H | 3.68681861  | 2.90111378  | 1.47733102  |
| H | 2.07575560  | 3.60699942  | 1.24470001  |
| H | 3.05522910  | 3.19799374  | -0.15372291 |
| H | -2.72212453 | -0.58684023 | -1.73891501 |
| H | -0.86936142 | -2.34388035 | 0.28197977  |
| H | -0.74395473 | -2.33278280 | -1.47404434 |
| H | -2.63990668 | -3.95457523 | -0.44116072 |
| H | -2.85068150 | -3.47109053 | -2.13350884 |
| H | -4.99160325 | -4.10909991 | -0.48216819 |
| H | -5.15291836 | -2.92798549 | -1.77495087 |
| H | -5.28437704 | -2.34254507 | 1.08615447  |
| H | -5.38841070 | -1.20615003 | -0.25202279 |
| H | -2.93823832 | -2.08087531 | 1.30624569  |
| H | -3.30377214 | -0.46839577 | 0.66500825  |

E(PBE0) = -861.612039 Hartree  
Dipole Moment = 5.104207 Debye

3.5 Cartesian coordinates optimized of 8-((diethylamino)methyl)-7-hydroxy-4-methyl-2*H*-chromen-2-one (**5c**) at PBE0/aug-cc-pvTZ level using the SMD model solvation.

Charge = 0 Multiplicity = 1

|   |             |             |             |
|---|-------------|-------------|-------------|
| C | -0.94602478 | 1.74718755  | -1.44610287 |
| C | -1.39896328 | 0.42472321  | -1.37732574 |
| C | -0.72910351 | -0.52922408 | -0.60048600 |
| C | 0.39410683  | -0.10502161 | 0.09819601  |
| C | 0.87202724  | 1.21059618  | 0.05012142  |
| C | 0.17214926  | 2.12731090  | -0.74571639 |
| O | 1.04008261  | -1.04979141 | 0.83973781  |
| C | 2.15819269  | -0.76868528 | 1.57371713  |
| C | 2.65087451  | 0.57045143  | 1.53862363  |
| C | 2.04634177  | 1.54182572  | 0.80841652  |
| O | 2.64119706  | -1.70030216 | 2.19910306  |
| C | 2.58611150  | 2.92845985  | 0.78892483  |
| O | -2.49284070 | 0.07269141  | -2.07390828 |
| C | -1.18821038 | -1.96123737 | -0.60391297 |
| N | -2.65385378 | -2.06090556 | -0.64007633 |
| C | -3.04435333 | -3.39066938 | -1.11870711 |
| C | -4.53223453 | -3.56799140 | -1.32455514 |
| C | -4.46699897 | -0.84274048 | 0.59960336  |
| C | -3.23759138 | -1.72679890 | 0.67388078  |
| H | -1.49193428 | 2.45530308  | -2.05682855 |
| H | 0.51755920  | 3.15137376  | -0.80502265 |
| H | 3.53684241  | 0.77241387  | 2.12522616  |
| H | 3.47251323  | 3.00902233  | 1.41567333  |
| H | 1.83589057  | 3.63875976  | 1.14517551  |
| H | 2.84627851  | 3.22626578  | -0.22987909 |
| H | -2.78380694 | -0.82375035 | -1.66735868 |
| H | -0.77534735 | -2.50787773 | 0.24953080  |
| H | -0.80430601 | -2.44485549 | -1.50760845 |
| H | -2.67513069 | -4.15477219 | -0.41801533 |
| H | -2.52973350 | -3.55263860 | -2.06841913 |
| H | -4.71467342 | -4.55303442 | -1.75889458 |
| H | -4.93148829 | -2.81704885 | -2.00970916 |
| H | -4.84315917 | -0.65630590 | 1.60828384  |
| H | -4.22657953 | 0.12167018  | 0.14800987  |
| H | -3.46277547 | -2.65511965 | 1.21261176  |
| H | -2.47452324 | -1.20865668 | 1.25842091  |
| H | -5.27063330 | -1.29797932 | 0.02069764  |
| H | -5.08914911 | -3.51425668 | -0.38816945 |

E(PBE0) = -862.806697 Hartree

Dipole Moment = 4.975896 Debye

3.6 Cartesian coordinates optimized of 6,7-dihydroxy-4-methyl-8-(piperidin-1-ylmethyl)-2*H*-chromen-2-one (**5d**) at PBE0/aug-cc-pvTZ level using the SMD model solvation.

Charge = 0 Multiplicity = 1

|   |             |             |             |
|---|-------------|-------------|-------------|
| O | -0.35143423 | -1.46122861 | -0.44623993 |
| C | -1.06101598 | -2.61665333 | -0.33612169 |
| C | -2.44762580 | -2.50904754 | -0.01163397 |
| C | -3.05233523 | -1.30876734 | 0.17232944  |
| C | -2.80029297 | 1.17585592  | 0.20195428  |
| C | -1.99702790 | 2.27618700  | 0.05443734  |
| C | -0.63289958 | 2.12336046  | -0.24845098 |
| C | -0.06128051 | 0.86618624  | -0.40345205 |
| C | -0.91075348 | -0.23228542 | -0.26315678 |
| C | -2.26848218 | -0.11063093 | 0.04080124  |
| O | -2.42481545 | 3.56528202  | 0.17765714  |
| O | 0.13471621  | 3.22476798  | -0.40499673 |
| C | 1.39636830  | 0.73040028  | -0.74843057 |
| N | 2.28208347  | 0.87105710  | 0.41021385  |
| O | -0.44328960 | -3.65501372 | -0.52693830 |
| C | 3.66182317  | 1.13549490  | -0.00046326 |
| C | 4.38666656  | -0.05938091 | -0.60757456 |
| C | 4.35577745  | -1.23813371 | 0.35542166  |
| C | 2.92227108  | -1.53814921 | 0.77210916  |
| C | 2.24407064  | -0.28300384 | 1.31037099  |
| C | -4.50018212 | -1.22298963 | 0.50361600  |
| H | -2.99595708 | -3.43710023 | 0.07694108  |
| H | -3.84887857 | 1.31086761  | 0.43778682  |
| H | -3.36982793 | 3.58420437  | 0.36532613  |
| H | -0.42046425 | 4.00674080  | -0.28676159 |
| H | 1.65360900  | 1.53123668  | -1.44357758 |
| H | 1.54333119  | -0.21045490 | -1.28866193 |
| H | 4.21034571  | 1.45667761  | 0.89233835  |
| H | 3.65771666  | 1.97885450  | -0.69497490 |
| H | 5.41617413  | 0.22768325  | -0.83985352 |
| H | 3.91537220  | -0.34141794 | -1.55500696 |
| H | 4.94453593  | -0.98631434 | 1.24604227  |
| H | 4.82132690  | -2.11983632 | -0.09292299 |
| H | 2.89508071  | -2.31249358 | 1.54412314  |
| H | 2.36528041  | -1.93008904 | -0.08420466 |
| H | 2.74886073  | 0.01459195  | 2.23618892  |
| H | 1.20443852  | -0.48816549 | 1.57392377  |
| H | -4.94260610 | -2.21518099 | 0.57249290  |
| H | -5.03553870 | -0.64992135 | -0.25780409 |
| H | -4.64781230 | -0.70356828 | 1.45384654  |

E(PBE0) = -976.069168 Hartree

Dipole Moment = 10.283564 Debye

### 3.7 Cartesian coordinates optimized of 6,7-dihydroxy-4-methyl-8-(pyrrolidin-1-ylmethyl)-2H-chromen-2-one (**5e**) at PBE0/aug-cc-pvTZ level using the SMD model solvation.

Charge = 0 Multiplicity = 1

|   |             |             |             |
|---|-------------|-------------|-------------|
| O | -0.30555982 | -1.38545660 | -0.50357691 |
| C | -0.96101599 | -2.57488624 | -0.42068608 |

|   |             |              |             |
|---|-------------|--------------|-------------|
| C | -2.35115299 | -2.53868420  | -0.09569081 |
| C | -3.00977061 | -1.37244364  | 0.11961934  |
| C | -2.86991120 | 1.11987500   | 0.21750125  |
| C | -2.11752701 | 2.25889457   | 0.09778796  |
| C | -0.74906965 | 2.17622788   | -0.21279789 |
| C | -0.12206370 | 0.95084159   | -0.40259152 |
| C | -0.92030292 | -0.18876770  | -0.28832120 |
| C | -2.28108632 | -0.13671413  | 0.02082023  |
| O | -2.60094281 | 3.52419370   | 0.25471979  |
| O | -0.03337963 | 3.31476821   | -0.34404820 |
| C | 1.33392046  | 0.88688770   | -0.76391909 |
| N | 2.23744849  | 1.04525656   | 0.38725772  |
| O | -0.29552388 | -3.57862428  | -0.63423610 |
| C | 3.62839184  | 1.08090019   | -0.08170361 |
| C | 4.05124710  | -0.37171600  | -0.34893125 |
| C | 3.12370725  | -1.19879606, | 0.55997934  |
| C | 2.24133558  | -0.14459215  | 1.24720402  |
| C | -4.45999535 | -1.36183907  | 0.45148624  |
| H | -2.85690779 | -3.49262849  | -0.03234850 |
| H | -3.92257891 | 1.20100027   | 0.45929120  |
| H | -3.54632137 | 3.49842954   | 0.43930741  |
| H | -0.62273810 | 4.06753038   | -0.20286168 |
| H | 1.54904242  | 1.70651660   | -1.45053273 |
| H | 1.51935435  | -0.04266860  | -1.31290483 |
| H | 4.24300246  | 1.50053816   | 0.71874783  |
| H | 3.72392799  | 1.73172328   | -0.95099644 |
| H | 5.10673885  | -0.52274049  | -0.11987569 |
| H | 3.90599123  | -0.63485520  | -1.39778846 |
| H | 3.67525839  | -1.78524983  | 1.29573302  |
| H | 2.52150395  | -1.89563809  | -0.02460207 |
| H | 2.68718039  | 0.13867508   | 2.20391887  |
| H | 1.22688227  | -0.48518029  | 1.45020407  |
| H | -4.85747304 | -2.37455881  | 0.48789776  |
| H | -5.02031893 | -0.78893697  | -0.29180443 |
| H | -4.63065295 | -0.88066685  | 1.41784844  |

E(PBE0) = -936.786401 Hartree

Dipole Moment = 10.259344 Debye

### 3.8 Cartesian coordinates optimized of 8-((diethylamino)methyl)-6,7-dihydroxy-4-methyl-2H-chromen-2-one (**5f**) at PBE0/aug-cc-pvTZ level using the SMD model solvation.

Charge = 0 Multiplicity = 1

|   |             |             |             |
|---|-------------|-------------|-------------|
| O | -0.36923776 | -1.53541740 | -0.44327886 |
| C | -1.07863885 | -2.69062082 | -0.33121130 |
| C | -2.46887965 | -2.58160874 | -0.02312955 |
| C | -3.07616120 | -1.38051094 | 0.14776112  |
| C | -2.82605257 | 1.10586202  | 0.16011313  |
| C | -2.02095977 | 2.20458126  | 0.00822226  |
| C | -0.65482856 | 2.04929870  | -0.28334869 |
| C | -0.08231734 | 0.79115393  | -0.42188581 |



|   |             |             |             |
|---|-------------|-------------|-------------|
| C | -0.93235296 | -0.30570738 | -0.27783629 |
| C | -2.29262637 | -0.18223167 | 0.01457030  |
| O | -2.45049122 | 3.49442204  | 0.11473284  |
| O | 0.11553502  | 3.14829958  | -0.44650919 |
| C | 1.38054074  | 0.65457649  | -0.74935295 |
| N | 2.24999746  | 0.79215373  | 0.41336792  |
| O | -0.45675908 | -3.72948888 | -0.50511666 |
| C | 3.59942678  | 1.21664016  | 0.05477208  |
| C | 4.33383496  | 0.46185290  | -1.04886623 |
| C | 2.74485917  | -1.66756819 | 0.96006586  |
| C | 2.17341440  | -0.31133710 | 1.36158628  |
| C | -4.52682794 | -1.29492136 | 0.46604178  |
| H | -3.01771567 | -3.50941020 | 0.06579857  |
| H | -3.87658624 | 1.24403904  | 0.38547116  |
| H | -3.39798595 | 3.51094328  | 0.28811395  |
| H | -0.43743609 | 3.93395940  | -0.34300592 |
| H | 1.64205069  | 1.45628449  | -1.44247258 |
| H | 1.53587989  | -0.28544689 | -1.29089124 |
| H | 4.19523677  | 1.19130062  | 0.97111084  |
| H | 3.54260482  | 2.26817334  | -0.24842726 |
| H | 5.30916701  | 0.92947221  | -1.20761886 |
| H | 3.79404001  | 0.51031215  | -1.99704209 |
| H | 2.45298197  | -2.41317967 | 1.70452567  |
| H | 2.36983009  | -2.00574091 | -0.00759253 |
| H | 2.67111136  | 0.01663520  | 2.27917735  |
| H | 1.11874911  | -0.43728110 | 1.62121309  |
| H | -4.96983522 | -2.28710571 | 0.52999657  |
| H | -5.05554694 | -0.72075865 | -0.29909311 |
| H | -4.68250943 | -0.77649556 | 1.41555148  |
| H | 4.50264491  | -0.58735760 | -0.80818336 |
| H | 3.83488727  | -1.65401546 | 0.92089910  |

E(PBE0) = -937.981135 Hartree

Dipole Moment = 10.565352 Debye

3.9 Theoretical calculations performed at several levels of theory, the final decision was made by accuracy with experimental data and other results already published.

**Table 1.** Topological indexes of electronic density in critical points for selected bonds of compounds **5a-5f** calculated at B3LYP/aug-cc-pVTZ level of theory.

|        | Entry     | $\nabla^2\rho(ea_0^{-5})$ | $\epsilon$ | V(a.u.) | $H_b$ (a.u.) | $H_b$ (kcal/mol) |
|--------|-----------|---------------------------|------------|---------|--------------|------------------|
| N13-H7 | <b>5a</b> | 0.1235                    | 0.0244     | -0.0417 | -0.0054      | -13.0836         |
|        | <b>5b</b> | 0.1239                    | 0.0245     | -0.0419 | -0.0055      | -13.1463         |
|        | <b>5c</b> | 0.1301                    | 0.0181     | -0.0453 | -0.0064      | -14.2131         |
| O6-H7  | <b>5d</b> | 0.0855                    | 0.6394     | -0.0182 | 0.0016       | -5.7103          |
|        | <b>5e</b> | 0.0855                    | 0.6345     | -0.0183 | 0.0015       | -5.7417          |

**5f**      0.0863      0.5779      -0.0186      0.0015      -5.8358

---

**Table 2.** Topological indexes of electronic density in critical points for selected bonds of compounds **5a-5f** calculated at PBE0/aug-cc-pVTZ level of theory.

|        | Entry     | $\nabla^2\rho(ea_0^{-5})$ | $\epsilon$ | V(a.u.) | $H_b(\text{kcal/mol})$ |
|--------|-----------|---------------------------|------------|---------|------------------------|
| N13-H7 | <b>5a</b> | 0.1554                    | 0.01540    | -0.0687 | -21.55                 |
|        | <b>5b</b> | 0.1557                    | 0.0176     | -0.0655 | -20.55                 |
|        | <b>5c</b> | 0.1527                    | 0.0182     | -0.0658 | -20.65                 |
| O6-H7  | <b>5d</b> | 0.0873                    | 1.0574     | -0.0190 | -5.96                  |
|        | <b>5e</b> | 0.0876                    | 1.0109     | -0.0191 | -5.99                  |
|        | <b>5f</b> | 0.0869                    | 1.2087     | -0.0188 | -5.90                  |

**Table 2.** Molecular orbital energies ( $E_{\text{HOMO}}$  and  $E_{\text{LUMO}}$ , eV), gap energies ( $\Delta E_g$ , eV), and total energy ( $E_{\text{Tot}}$ , hartree) of **4a**, **4b**, and **5a-5f** compounds calculated at B3LYP/aug-cc-pVTZ level of theory.

| Compound  | $E_{\text{HOMO}}$ | $E_{\text{LUMO}}$ | $\Delta E_g$       | $E_{\text{Tot}}$ |
|-----------|-------------------|-------------------|--------------------|------------------|
| <b>4a</b> | -6.326            | -1.892            | 4.434              | -611.8156        |
| <b>5a</b> | -6.134            | -1.823            | 4.310              | -901.9404        |
| <b>5b</b> | -6.146            | -1.828            | 4.319              | -862.6064        |
| <b>5c</b> | -6.152            | -1.830            | 4.321              | -863.8132        |
| <b>4b</b> | -6.078            | -1.901            | 4.178 <sup>a</sup> | -687.0728        |
| <b>5d</b> | -5.729            | -1.860            | 3.869              | -977.1871        |
| <b>5e</b> | -6.045            | -1.866            | 4.178              | -937.8548        |
| <b>5f</b> | -5.652            | -1.856            | 3.797              | -939.0624        |

<sup>a</sup> $\Delta E_{g\text{-reported}} = 4.154$  eV in ref. 24.

**Table 2.** Molecular orbital energies ( $E_{\text{HOMO}}$  and  $E_{\text{LUMO}}$ , eV), gap energies ( $\Delta E_g$ , eV), and total energy ( $E_{\text{Tot}}$ , hartree) of **4a**, **4b**, and **5a-5f** compounds calculated at  $\omega$ B97XD/aug-cc-pVTZ level of theory.

| Compound  | $E_{\text{HOMO}}$ | $E_{\text{LUMO}}$ | $\Delta E_g$ | $E_{\text{Tot}}$ |
|-----------|-------------------|-------------------|--------------|------------------|
| <b>4a</b> | -8.176            | 0.005             | 8.181        | -611.6022        |
| <b>5a</b> | -7.996            | 0.053             | 8.049        | -901.6474        |

|           |        |        |                    |           |
|-----------|--------|--------|--------------------|-----------|
| <b>5b</b> | -8.012 | 0.049  | 8.061              | -862.3232 |
| <b>5c</b> | -8.028 | 0.043  | 8.071              | -863.5295 |
| <b>4b</b> | -7.916 | -0.012 | 7.904 <sup>a</sup> | -686.8372 |
| <b>5d</b> | -7.828 | 0.015  | 7.843              | -976.8746 |
| <b>5e</b> | -7.894 | 0.008  | 7.902              | -937.5519 |
| <b>5f</b> | -7.902 | 0.017  | 7.799              | -938.7581 |

<sup>a</sup> $\Delta E_{g\text{-reported}} = 4.154$  eV in ref. 24.

**Table 2.** Molecular orbital energies ( $E_{\text{HOMO}}$  and  $E_{\text{LUMO}}$ , eV), gap energies ( $\Delta E_g$ , eV), and total energy ( $E_{\text{Tot}}$ , hartree) of **4a**, **4b**, and **5a-5f** compounds calculated at M06-2X/aug-cc-pVTZ level of theory.

| <b>Compound</b> | <b><math>E_{\text{HOMO}}</math></b> | <b><math>E_{\text{LUMO}}</math></b> | <b><math>\Delta E_g</math></b> | <b><math>E_{\text{Tot}}</math></b> |
|-----------------|-------------------------------------|-------------------------------------|--------------------------------|------------------------------------|
| <b>4a</b>       | -7.621                              | -0.933                              | 6.688                          | -611.5788                          |
| <b>4b</b>       | -7.376                              | -0.954                              | 6.421 <sup>a</sup>             | -686.8150                          |

<sup>a</sup> $\Delta E_{g\text{-reported}} = 4.154$  eV in ref. 24.

**Table 2.** Molecular orbital energies ( $E_{\text{HOMO}}$  and  $E_{\text{LUMO}}$ , eV), gap energies ( $\Delta E_g$ , eV), and total energy ( $E_{\text{Tot}}$ , hartree) of **4a**, **4b**, and **5a-5f** compounds calculated at M06/aug-cc-pVTZ level of theory.

| <b>Compound</b> | <b><math>E_{\text{HOMO}}</math></b> | <b><math>E_{\text{LUMO}}</math></b> | <b><math>\Delta E_g</math></b> | <b><math>E_{\text{Tot}}</math></b> |
|-----------------|-------------------------------------|-------------------------------------|--------------------------------|------------------------------------|
| <b>4a</b>       | -6.527                              | -1.602                              | 4.925                          | -611.4037                          |
| <b>4b</b>       | -6.265                              | -1.613                              | 4.652 <sup>a</sup>             | -686.6300                          |

<sup>a</sup> $\Delta E_{g\text{-reported}} = 4.154$  eV in ref. 24.

**Table 2.** Molecular orbital energies ( $E_{\text{HOMO}}$  and  $E_{\text{LUMO}}$ , eV), gap energies ( $\Delta E_g$ , eV), and total energy ( $E_{\text{Tot}}$ , hartree) of **4a**, **4b**, and **5a-5f** compounds calculated at PBE0/aug-cc-pVTZ level of theory.

| <b>Compound</b> | <b><math>E_{\text{HOMO}}</math></b> | <b><math>E_{\text{LUMO}}</math></b> | <b><math>\Delta E_g</math></b> | <b><math>E_{\text{Tot}}</math></b> |
|-----------------|-------------------------------------|-------------------------------------|--------------------------------|------------------------------------|
| <b>4a</b>       | -6.523                              | -1.700                              | 4.823                          | -611.1178                          |
| <b>5a</b>       | -6.317                              | -1.633                              | 4.683                          | -900.8969                          |
| <b>5b</b>       | -6.330                              | -1.636                              | 4.693                          | -861.6120                          |
| <b>5c</b>       | -6.333                              | -1.640                              | 4.694                          | -862.8067                          |
| <b>4b</b>       | -6.250                              | -1.705                              | 4.545 <sup>a</sup>             | -686.3014                          |
| <b>5d</b>       | -5.979                              | -1.671                              | 4.308                          | -976.0692                          |

|           |        |        |       |           |
|-----------|--------|--------|-------|-----------|
| <b>5e</b> | -6.223 | -1.678 | 4.545 | -936.7864 |
| <b>5f</b> | -5.920 | -1.669 | 4.251 | -937.9811 |

<sup>a</sup> $\Delta E_{g\text{-reported}} = 4.154$  eV in ref. 24.

**Table 2.** Molecular orbital energies ( $E_{\text{HOMO}}$  and  $E_{\text{LUMO}}$ , eV), gap energies ( $\Delta E_g$ , eV), and total energy ( $E_{\text{Tot}}$ , hartree) of **4a**, **4b**, and **5a-5f** compounds calculated at HSE/aug-cc-pVTZ level of theory.

| Compound  | $E_{\text{HOMO}}$ | $E_{\text{LUMO}}$ | $\Delta E_g$       | $E_{\text{Tot}}$ |
|-----------|-------------------|-------------------|--------------------|------------------|
| <b>4a</b> | -6.144            | -2.068            | 4.076              | -611.1716        |
| <b>4b</b> | -5.872            | -2.073            | 3.799 <sup>a</sup> | -686.3618        |

<sup>a</sup> $\Delta E_{g\text{-reported}} = 4.154$  eV in ref. 24.

**Table 3.** Calculated maximum absorption wavelengths  $\lambda_{\text{max}}$  (nm), oscillator strengths ( $f$ ), transition energy ( $E_{g\text{-theo}}$ , eV), % of contribution, and assignment of **4a**, **4b**, and **5a-5f** compounds calculated at B3LYP/aug-cc-pVTZ level of theory.

| Compound  | $\lambda_{\text{max}}$ | $f$    | $E_{g\text{-theo}}$ | %Major Contribution | Assignment              |
|-----------|------------------------|--------|---------------------|---------------------|-------------------------|
| <b>4a</b> | 327.41 <sup>a</sup>    | 0.7058 | 3.7869 <sup>b</sup> | HOMO->LUMO (99%)    | $\pi \rightarrow \pi^*$ |
| <b>5a</b> | 330.99                 | 0.5949 | 3.7459              | HOMO->LUMO (98%)    | $\pi \rightarrow \pi^*$ |
| <b>5b</b> | 336.95                 | 0.6777 | 3.6796              | HOMO->LUMO (99%)    | $\pi \rightarrow \pi^*$ |
| <b>5c</b> | 336.73                 | 0.6797 | 3.6820              | HOMO->LUMO (99%)    | $\pi \rightarrow \pi^*$ |
| <b>4b</b> | 348.25                 | 0.5558 | 3.5602              | HOMO->LUMO (99%)    | $\pi \rightarrow \pi^*$ |
| <b>5d</b> | 378.83                 | 0.0046 | 3.2728              | HOMO->LUMO (100%)   | $n \rightarrow \pi^*$   |
| <b>5e</b> | 348.24                 | 0.5373 | 3.5603              | HOMO->LUMO (99%)    | $n \rightarrow \pi^*$   |
| <b>5f</b> | 388.32                 | 0.0042 | 3.1928              | HOMO->LUMO (100%)   | $n \rightarrow \pi^*$   |

<sup>a</sup> $\lambda_{\text{max}} = 325$  nm in toluene solvent in ref. 23 and <sup>b</sup> $E_{g\text{-theo}} = 319\text{nm} - 323\text{nm}$  in different organic solvents in ref. 32.

**Table 3\_new.** Calculated maximum absorption wavelengths  $\lambda_{\text{max}}$  (nm), oscillator strengths ( $f$ ), transition energy ( $E_{g\text{-theo}}$ , eV), % of contribution, and assignment of **4a**, **4b**, and **5a-5f** compounds calculated at PBE0/aug-cc-pVTZ level of theory.

| Compound | $\lambda_{\text{max}}$ | $f$ | $E_{g\text{-theo}}$ | %Major Contribution | Assignment |
|----------|------------------------|-----|---------------------|---------------------|------------|
|----------|------------------------|-----|---------------------|---------------------|------------|

|           |                     |        |                     |                   |                         |
|-----------|---------------------|--------|---------------------|-------------------|-------------------------|
| <b>4a</b> | 300.73 <sup>a</sup> | 0.4392 | 4.1227 <sup>b</sup> | HOMO->LUMO (100%) | $\pi \rightarrow \pi^*$ |
| <b>5a</b> | 310.79              | 0.3997 | 3.9893              | HOMO->LUMO (99%)  | $\pi \rightarrow \pi^*$ |
| <b>5b</b> | 310.06              | 0.4010 | 3.9987              | HOMO->LUMO (100%) | $\pi \rightarrow \pi^*$ |
| <b>5c</b> | 310.06              | 0.4017 | 3.9987              | HOMO->LUMO (100%) | $\pi \rightarrow \pi^*$ |
| <b>4b</b> | 322.38              | 0.3282 | 3.8458              | HOMO->LUMO (99%)  | $\pi \rightarrow \pi^*$ |
| <b>5d</b> | 348.71              | 0.0038 | 3.5556              | HOMO->LUMO (98%)  | $n \rightarrow \pi^*$   |
| <b>5e</b> | 322.91              | 0.2948 | 3.8392              | HOMO->LUMO (100%) | $n \rightarrow \pi^*$   |
| <b>5f</b> | 355.49              | 0.0031 | 3.4877              | HOMO->LUMO (98%)  | $n \rightarrow \pi^*$   |

---

<sup>a</sup> $\lambda_{\text{max}}$ =325 nm in toluene solvent in ref. 23 and <sup>b</sup>  $E_{\text{g-theo}}$ =319nm-323nm in different organic solvents in ref. 32.

#### 4. Test to verify the authenticity of Human Cell Line

Test to verify the authenticity Human Cell Line.

Result issued on: November 23, 2020 14:19 hrs

Methodology: DNA extraction was performed from the provided sample using the appropriate methodology according to the type of sample delivered (Maxwell 16 from Promega. QIAAmp DNA Blood Mini Kit from QIAGEN Prep-n-go buffer from AB or FTA Purification Reagent from GE). Multiplex-type polymerase chain reaction and capillary electrophoresis on AB's 3500 Genetic Analyzer, fragment analysis on Gene Mapper ID v5.

Results:

| <i>Marcador</i>    | LCH1120-220-33 |
|--------------------|----------------|
| <i>D3S1358</i>     | 15 18          |
| <i>vWA</i>         | 16 18          |
| <i>D16S539</i>     | 9 9            |
| <i>CSF1PO</i>      | 9 10           |
| <i>TPOX</i>        | 8 12           |
| <i>D8S1179</i>     | 12 12          |
| <i>D21S11</i>      | 27 28          |
| <i>D18S51</i>      | 13 16          |
| <i>Penta E</i>     | 7 17           |
| <i>D2S441</i>      | 10 11          |
| <i>D19S433</i>     | 13 14          |
| <i>TH01</i>        | 7 7            |
| <i>FGA</i>         | 18 21          |
| <i>D22S1045</i>    | 16 17          |
| <i>D5S818</i>      | 11 12          |
| <i>D13S317</i>     | 12 13.3        |
| <i>D7S820</i>      | 8 12           |
| <i>D6S1043</i>     | 18 18          |
| <i>D10S1248</i>    | 13 15          |
| <i>D1S1656</i>     | 12 15          |
| <i>D12S391</i>     | 20 25          |
| <i>D2S1338</i>     | 17 17          |
| <i>Penta D</i>     | 8 15           |
| <i>Amelogenina</i> | X X            |

From the short tandem repeat (STR) DNA profiles, identity of the cell line was corroborated at CLASTR, which is an STR profile search tool available through Cellosaurus (<https://web.expasy.org/cellosaurus-str-search/>). According with this database, cells were authenticated as a **derivative of HeLa cell line**.
